# Supplementary material
Source: ML conference proceedings conference paper supplement (https://proceedings.neurips.cc/paper_files/paper/2009/hash/c0e190d8267e36708f955d7ab048990d-Abstract.html)
Supplement: Supplementary file 1 [file c0e190d8267e36708f955d7ab048990d-Supplemental.zip]

Archive with 1 entries (1 files):
- extra/NIPS2009_0219_extra.pdf
